# Supplementary material for: Targeting Liver Epsins Ameliorates Dyslipidemia in Atherosclerosis through Inhibition of Proprotein Convertase Subtilisin/Kexin Type 9-Mediated Low-density Lipoprotein Receptor Degradation
Source: PubMed Central journal article supplement — bioRxiv. 2025 Aug 13:2024.08.26.609742. Originally published 2024 Aug 27. Preprint. [Version 2] doi: 10.1101/2024.08.26.609742 (PMC11383288; doi:10.1101/2024.08.26.609742), 2025-08-13
Supplement: NIHPP2024.08.26.609742V1-supplement-1.pdf [file NIHPP2024.08.26.609742V1-supplement-1.pdf]

1374 **Fig.S1 Overview of animal models.** A: Workflow of generation of *epsin1*<sup>fl/fl</sup>, *epsin2*<sup>-/-</sup>, Albumin  
1375 Cre<sup>+/-</sup> (Liver-DKO), *epsin1*<sup>+/+</sup>, and *epsin2*<sup>+/+</sup>, Albumin Cre<sup>+/-</sup> as control group (WT). B:  
1376 Workflow of generation of *epsin1*<sup>fl/fl</sup>, *epsin2*<sup>-/-</sup>, Albumin Cre<sup>+/-</sup>, *Apoe*<sup>-/-</sup> (Liver-DKO / *Apoe*<sup>-/-</sup>),  
1377 and *epsin1*<sup>+/+</sup>, *epsin2*<sup>+/+</sup>, Albumin Cre<sup>+/-</sup>, *Apoe*<sup>-/-</sup> as control group (WT / *Apoe*<sup>-/-</sup>).  
1378

1379 **Fig.S2 Elevated epsin1 and epsin2 expression in the aorta from CAD patients, and**  
1380 **recruitment of CD68 positive macrophages in the aorta from CAD patients that**  
1381 **colocalization to both epsin1 and epsin2.** A: Immunofluorescence co-stain of epsin1 and CD68  
1382 antibodies in aortas from both healthy control and CAD patients, epsin1 is in red color, CD68 is  
1383 in green color, and DAPI is used for nuclei stain. The atherosclerotic lesion is encircled with  
1384 dashed line in CAD patients. B: Immunofluorescence co-stain of epsin2 and CD68 antibodies in  
1385 aortas from both healthy control and CAD patients, epsin2 is in red color, CD68 is in green color,  
1386 and DAPI is used for nuclei stain. The atherosclerotic lesion is highlighted that below the dashed  
1387 line in CAD patients. C: Quantification of epsin1 and epsin2 immunofluorescence signal intensity  
1388 between healthy control and CAD patients. CD68 expression is highly colocalized with both  
1389 epsin1 and epsin2 in CAD patients, and the overlay percentage between CD68 and epsin1 or CD68  
1390 and epsin2 are quantified. N=5, \*\*\* p<0.001.  
1391

1392 **Fig.S3 Elevated expression of epsin1 and epsin2 but diminished expression of LDLR protein**  
1393 **in hepatocytes from the livers of NASH patients.** A: Immunofluorescence staining of epsin1,  
1394 epsin2, LDLR and albumin protein in the livers of healthy control (left) and NASH patients (right).  
1395 LDLR protein signals in green color, and albumin protein signals in red color, DAPI is used for  
1396 nuclei stain. B: Quantification of epsin1, epsin2, LDLR immunofluorescence signal intensity in  
1397 both healthy control and NASH patients. N=5, \*\*\* p<0.001.

1398

1399 **Fig.S4 Diminished HNF4 $\alpha$  expression level in NASH (Cirrhosis) patients.** A:  
1400 Immunofluorescence stain of HNF4 $\alpha$  in the liver from both healthy control and cirrhosis patients  
1401 (left), HNF4 $\alpha$  is in green color, and DAPI is used for nuclei stain. Quantification of HNF4 $\alpha$   
1402 immunofluorescence signal intensity between healthy control and cirrhosis patients (right). B:  
1403 Western blot of HNF4 $\alpha$  for the liver lysates from biopsy in both healthy control and NASH patients,  
1404 beta-Actin is used as internal reference (left), the quantification of HNF4 $\alpha$  expression in both  
1405 healthy control and cirrhosis patients (right). C: Relative expression of HNF4 $\alpha$  mRNA in both  
1406 healthy control and NASH patients measured by RT-qPCR. N=3, \* p<0.05, \*\* p<0.01, \*\*\*  
1407 p<0.001.

1408

1409 **Fig. S5: Single-cell RNA-sequencing reveals hepatocyte transition in Liver-DKO mice on an**  
1410 **ApoE<sup>-/-</sup> background.** A: A relatively high proportion of HC Hnf4 $\alpha$ <sup>hi</sup> in ApoE<sup>-/-</sup>/Liver-DKO and a  
1411 relatively high proportion of HC2 Alb<sup>hi</sup> and HC3 Alb<sup>hi</sup> of ApoE<sup>-/-</sup>. B: Pseudotime trajectory and  
1412 Rna velocity analysis mapping the transition pathway from lipogenic Alb<sup>hi</sup> hepatocytes to  
1413 glucogenic Hnf4 $\alpha$ <sup>hi</sup> hepatocytes in ApoE<sup>-/-</sup>/Liver-DKO, in contrast to ApoE<sup>-/-</sup>. C-E: CellRank  
1414 analysis indicating more dynamic shifts from lipogenic Alb<sup>hi</sup> hepatocytes to glucogenic Hnf4 $\alpha$ <sup>hi</sup>  
1415 hepatocytes in ApoE<sup>-/-</sup>/Liver-DKO compared to ApoE<sup>-/-</sup>. CellRank probability calculation for  
1416 hepatocyte sub-cell populations in ApoE<sup>-/-</sup> (C), and in ApoE<sup>-/-</sup>/Liver-DKO (E). D-F: Violin plots  
1417 show transition probabilities of initial to terminal states within hepatocyte sub-cell populations.  
1418 in ApoE<sup>-/-</sup> controls (D), and in ApoE<sup>-/-</sup>/Liver-DKO mice (F). **Note:** We used the two-sample  
1419 proportion test to compare the cell's proportion in panel (A).

1420

1421 **Fig.S6: Comprehensive cell type-specific gene markers and their corresponding expressions.**  
1422 A: UMAP visualization of ApoE<sup>-/-</sup>/Liver-DKO cell populations compared to ApoE<sup>-/-</sup>. B: Dot plot  
1423 illustrating the percentage of cells expressing each gene marker corresponding to specific cell types  
1424 in ApoE<sup>-/-</sup>/Liver-DKO and ApoE<sup>-/-</sup> mice. The size of the dots represents the proportion of cells  
1425 expressing the marker, while the color intensity indicates the expression level of the gene marker  
1426 in each cell type.

1427

1428 **Fig.S7: Diminished expression of lipogenic genes and elevated apolipoprotein genes are**  
1429 **identified as indicators of inhibition of lipogenesis in HNF4 $\alpha$ <sup>hi</sup> hepatocytes.** A: Feature plots  
1430 show diminished expression of lipogenic genes in ApoE<sup>-/-</sup>/Liver-DKO compared to ApoE<sup>-/-</sup>. B:  
1431 Shows gene expression dynamic with respect to pseudo time from Alb<sup>hi</sup> to Hnf4 $\alpha$ <sup>hi</sup> hepatocytes.  
1432 The elevated HNF4 $\alpha$  expression in HNF4 $\alpha$ <sup>hi</sup> hepatocytes is positively correlated to the diminished  
1433 expression of Acaca and the elevated expression of Apoa4 and Apob in ApoE<sup>-/-</sup>/Liver-DKO.

1434

1435 **Fig.S8: Enhanced GO pathways enriched in plasma lipoprotein particle clearance and**  
1436 **diminished glycolytic process in ApoE<sup>-/-</sup>/Liver-DKO hepatocytes.** A-C: CNET plots highlight  
1437 the specific GO pathway enrichments related to genes upregulated in ApoE<sup>-/-</sup>/Liver-DKO within  
1438 the hepatocyte subtypes. D-G: CNET plots highlight the GO pathway enrichments related to genes  
1439 downregulated in ApoE<sup>-/-</sup>/Liver-DKO within the hepatocyte sub-populations. **Note:** The edge  
1440 color represents different pathways, and the corresponding circle's number indicates the number  
1441 of genes associated with the pathway.

1442

1443 **Fig.S9: Enhanced Rora-cholesterol and Sdc4-Fn1 communication pathways and diminished**  
1444 **Bsg-Ppia and Nr1h4-AndrosteroneHSD17B6 communication pathways in ApoE<sup>-/-</sup>/Liver-**  
1445 **DKO hepatocytes.** A: Chord plot highlights the specific Rora-cholesterol and Sdc4-Fn1  
1446 communication related to genes and metabolites upregulated in ApoE<sup>-/-</sup>/Liver-DKO. B: Chord plot  
1447 exhibits the specific Bsg-Ppia and Nr1h4-AndrosteroneHSD17B6 communication associated to  
1448 genes and metabolites downregulated in ApoE<sup>-/-</sup>/Liver-DKO. **Note:** Edge and outer lower half-  
1449 circle colors represent sender cell types, while inner lower and upper half-circle colors indicate  
1450 receiver cell types.

1451  
1452 **Fig.S10: Elevated gene expression related to glycogenesis and diminished lipogenic gene**  
1453 **expression in ApoE<sup>-/-</sup>/Liver-DKO as compared to ApoE<sup>-/-</sup>, shown through single-cell analysis**  
1454 **and real-time quantitative PCR (qPCR) validation.** A: Violin plots of gene expression related  
1455 to glycogenesis (Gys2, Gck, Pgm1) and lipogenesis (Acly) and cholesterol clearance (Apoa2,  
1456 Apob) in ApoE<sup>-/-</sup>/Liver-DKO as compared to ApoE<sup>-/-</sup>, shown through single-cell analysis B:  
1457 Validation of genes expression involved in glycogenesis and lipogenesis by real-time quantitative  
1458 PCR (qPCR) in the liver from both ApoE<sup>-/-</sup> and ApoE<sup>-/-</sup>/Liver-DKO mice. N=3, \* p<0.05, \*\*  
1459 p<0.001, \*\*\* p<0.0001.

1460  
1461  
1462 **Fig.S11: Elevated gene expression related to glycogenesis and diminished lipogenic gene**  
1463 **expression in different clustered hepatocytes, including HC1 Alb<sup>hi</sup>, HC2 Alb<sup>hi</sup>, HC3 Alb<sup>hi</sup>,**  
1464 **and HC HNF4a<sup>hi</sup> in ApoE<sup>-/-</sup>/Liver-DKO as compared to ApoE<sup>-/-</sup>.** A: Downregulated expression  
1465 of lipogenic genes, such as Scd1, Acaca, but with upregulated expression apolipoprotein genes  
1466 (Apoa4, Apob) in different clustered hepatocytes in the liver of ApoE<sup>-/-</sup>/Liver-DKO, indicates  
1467 diminished lipogenesis and elevated capacity for low-density lipoprotein clearance in the liver of  
1468 ApoE<sup>-/-</sup>/Liver-DKO. B: Upregulated expression of glycogenic genes, such as Pgm1, Gys2, and  
1469 Ugp2, in different clustered hepatocytes in the liver of ApoE<sup>-/-</sup>/Liver-DKO, reveals elevated  
1470 glycogenesis in the liver of ApoE<sup>-/-</sup>/Liver-DKO.

1471  
1472 **Fig.S12: Diminished apolipoprotein genes expression in hPCSK9-D374Y mutant compared**  
1473 **with control.** Downregulated expression of apolipoprotein genes, such as Apoa1, Apoa2, Apoa4,  
1474 Apoc1, Apoc2, Apoc3 and Apob, in different clustered hepatocytes (HC1, HC2, HC3) in hPCSK9-  
1475 D374Y mutant compared with control, indicates diminished low-density lipoprotein clearance in  
1476 hPCSK9-D374Y mutant.

1477  
1478 **Fig.S13: Diminished HNF4a and elevated epsin1 expression in the different clustered**  
1479 **hepatocytes in the liver from hPCSK9-D374Y mutant.** Downregulated expression of genes  
1480 involved in the transportation of low-density lipoprotein cholesterol and lipogenesis, such as Ldlr,  
1481 Abca1, and genes participate in fatty acid metabolism (Sdc4) in the different clustered hepatocytes  
1482 in the liver from hPCSK9-D374Y mutant, indicates the dyslipidemia in hPCSK9-D374Y mutant.  
1483 Diminished HNF4a and Albumin expression in the different clustered hepatocytes (HC1, HC2,  
1484 HC3) in the liver in hPCSK9-D374Y mutant, which negatively correlated to its elevated epsin1  
1485 expression.

1486  
1487 **Fig.S14: Elevated expression lipogenic genes and diminished glycogenic genes in the different**  
1488 **clustered hepatocytes in the liver in hPCSK9-D374Y mutant.** A: Upregulated expression of

1489 genes involved in lipogenesis, such as Acly and Fasn, in the different clustered hepatocytes in the  
1490 liver in hPCSK9-D374Y mutant. B: Downregulated expression of genes that participate in  
1491 glycogenesis, such as Gys2 and Ugp2, in the different clustered hepatocytes in the liver in  
1492 hPCSK9-D374Y mutant.

1493  
1494  
1495  
1496  
1497  
1498  
1499  
1500  
1501  
1502  
1503  
1504  
1505  
1506  
1507  
1508  
1509  
1510  
1511  
1512  
1513  
1514  
1515  
1516  
1517  
1518  
1519  
1520  
1521  
1522  
1523  
1524  
1525  
1526  
1527  
1528  
1529  
1530  
1531  
1532  
1533  
1534

1621 Fig.S1

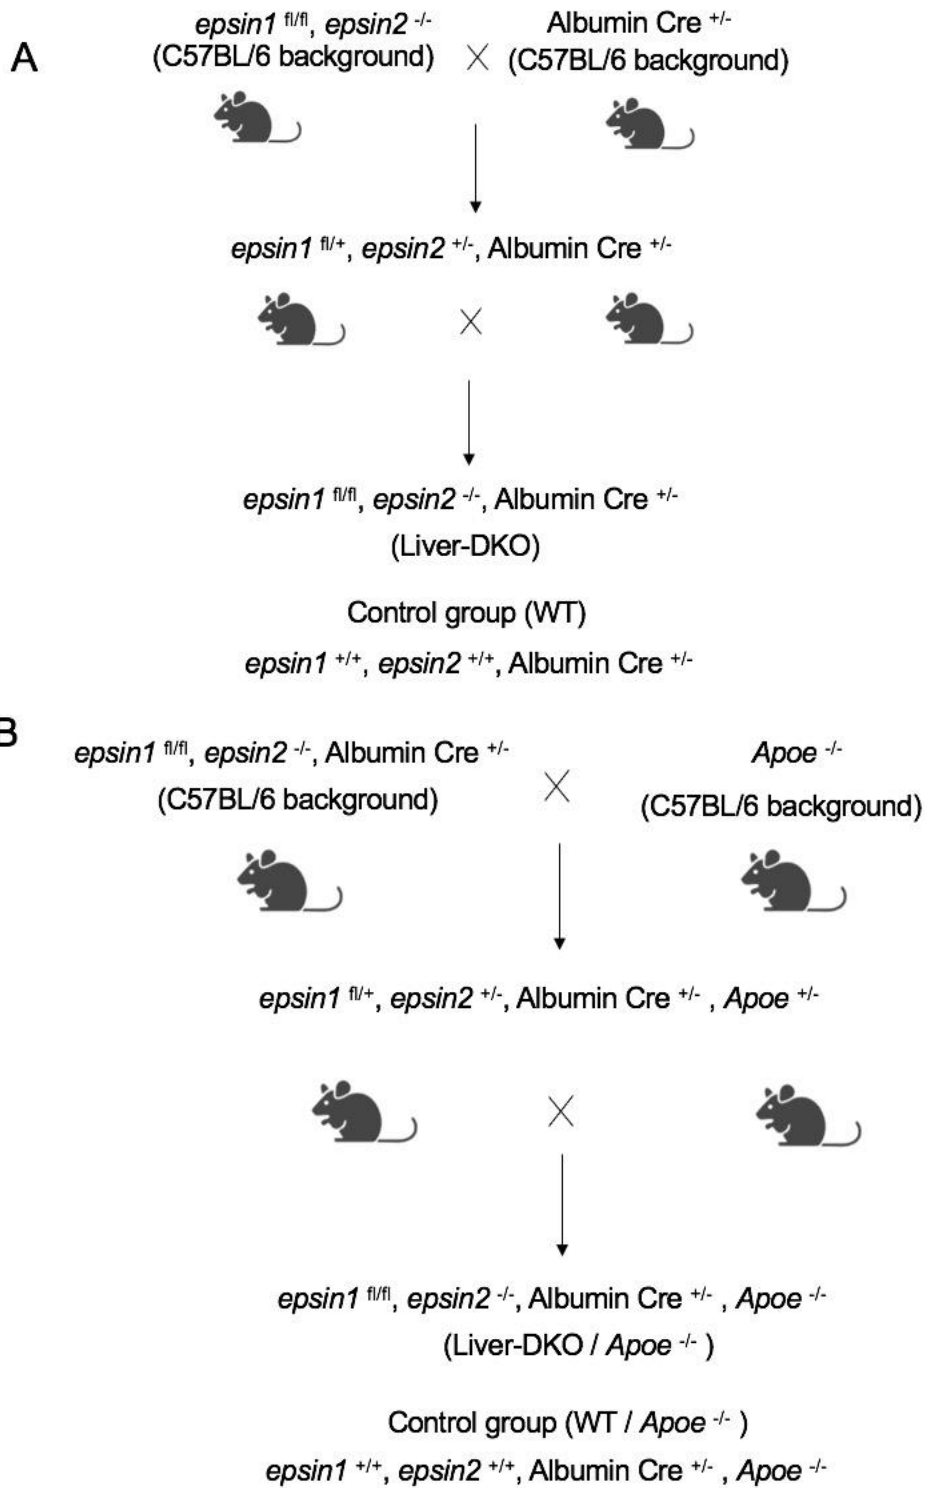

1622  
1623  
1624  
1625



1626 Fig.S2

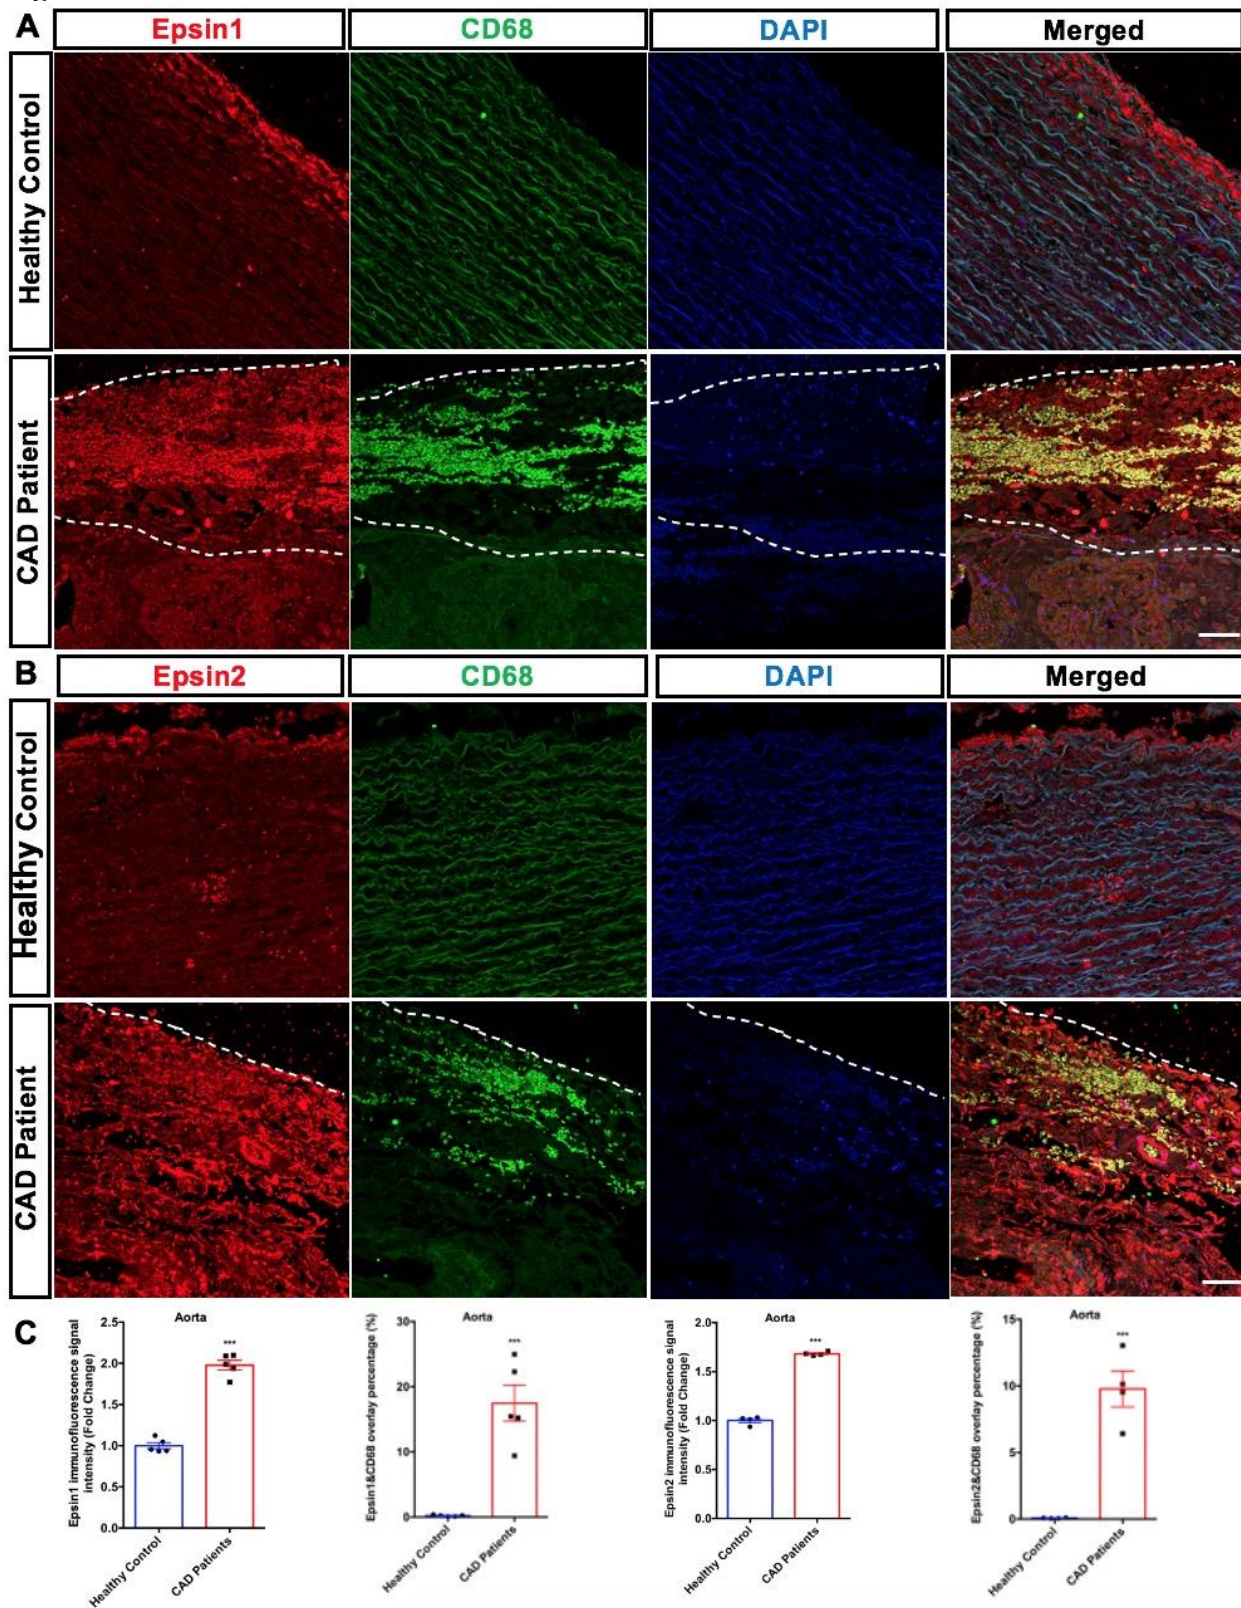

1627  
1628  
1629

1630  
1631  
1632

Fig.S3

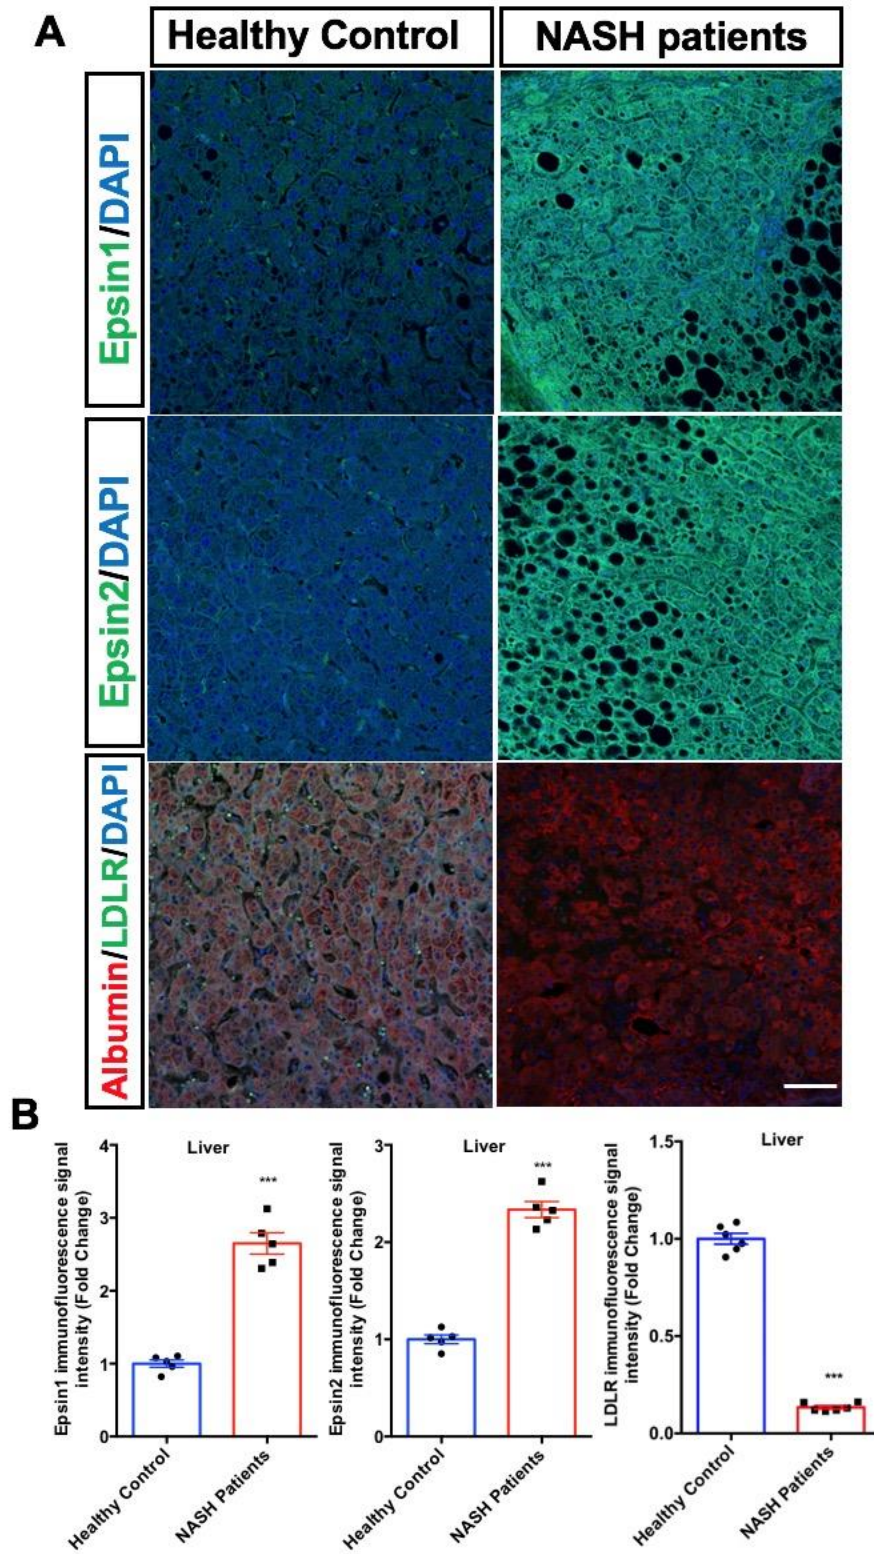

1633



1634  
1635

Fig.S4

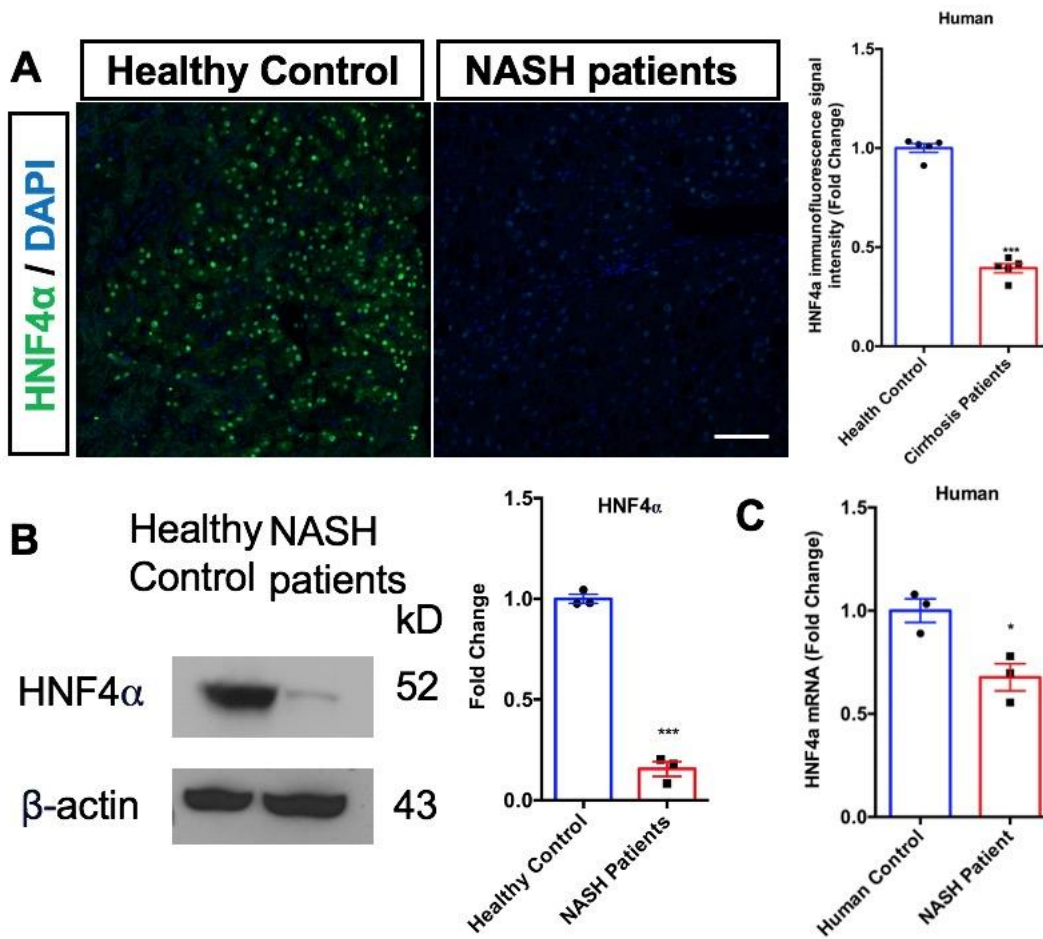

1636  
1637  
1638  
1639  
1640  
1641  
1642  
1643  
1644  
1645  
1646  
1647  
1648  
1649  
1650  
1651  
1652  
1653  
1654



1655  
1656

**Fig.S5**

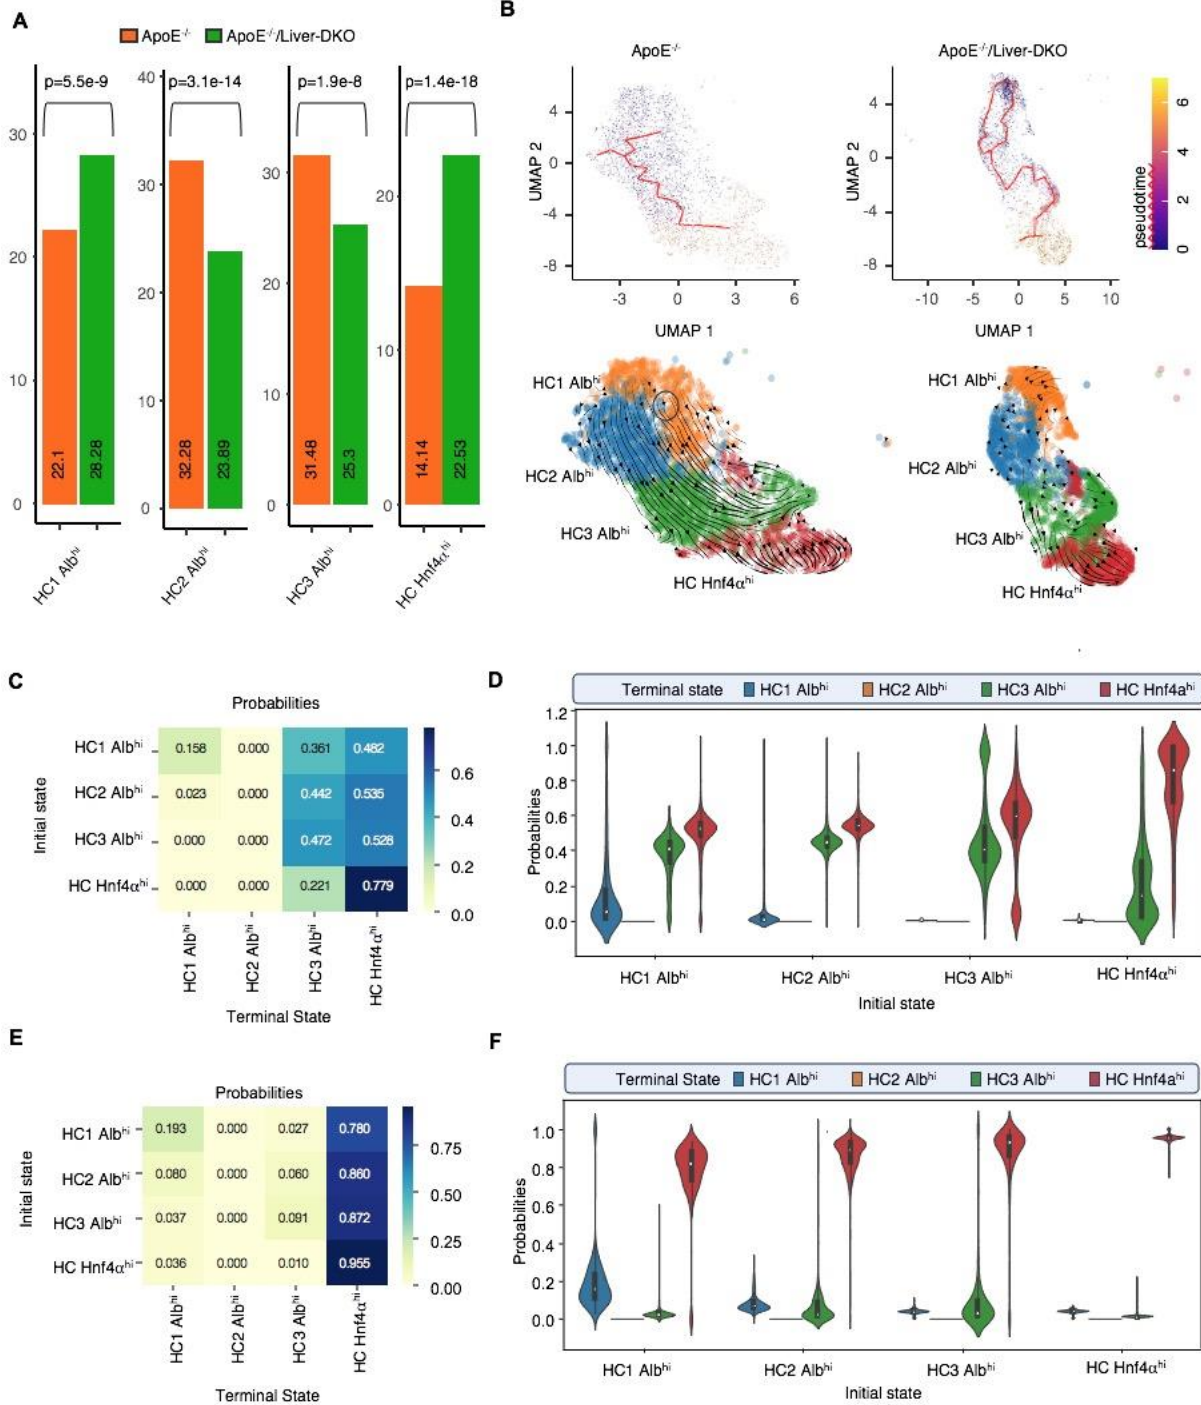

1657  
1658  
1659  
1660  
1661  
1662  
1663

1664 **Fig.S6**

**A**

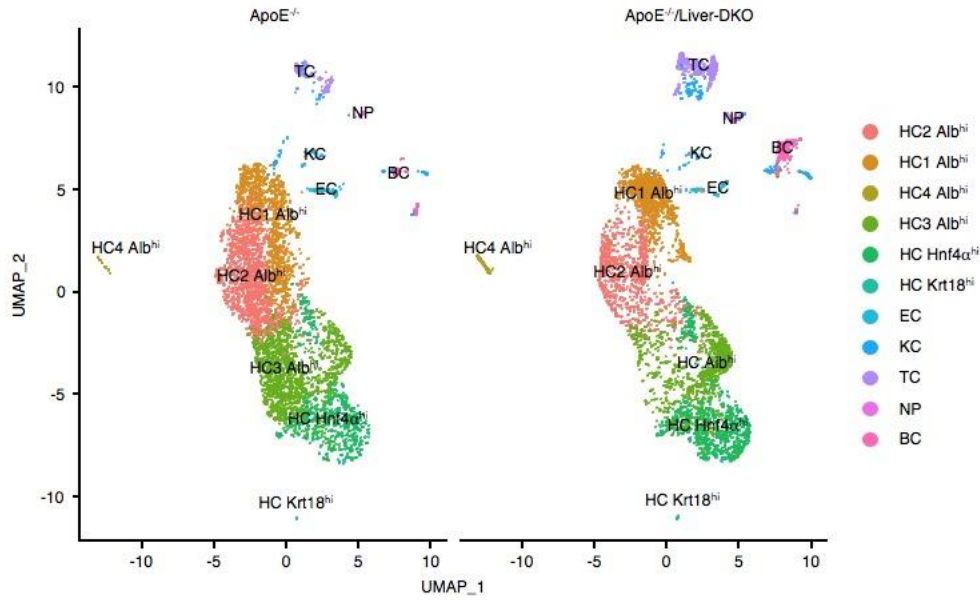

**B**

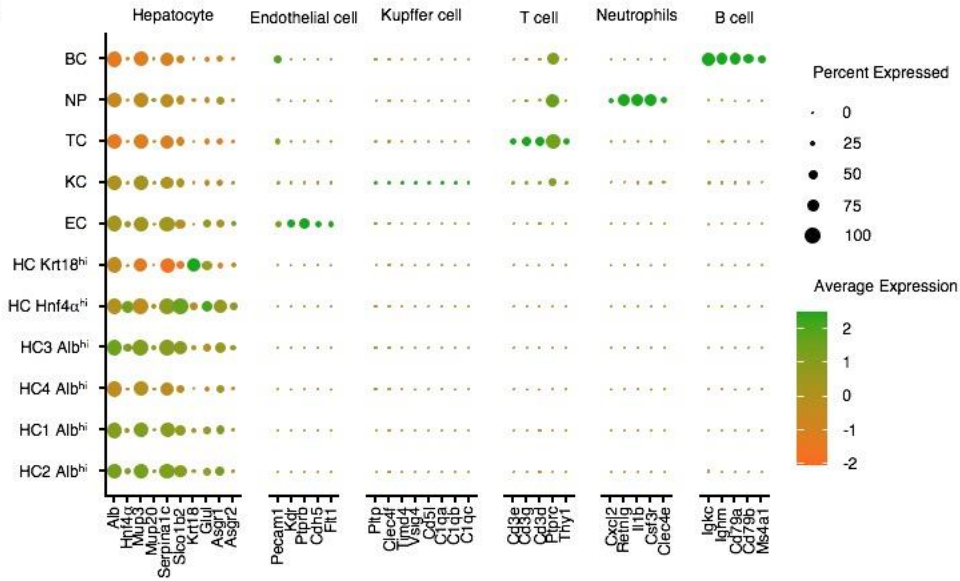

1665  
1666  
1667  
1668  
1669  
1670  
1671  
1672  
1673  
1674

1675  
1676

**Fig.S7**

**A**

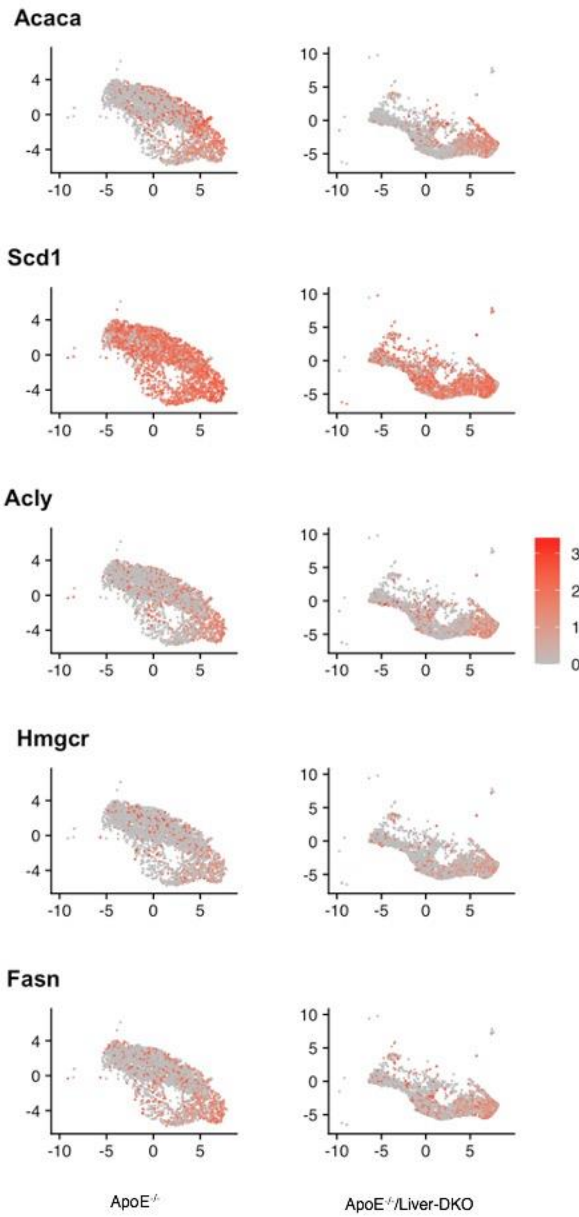

**B**

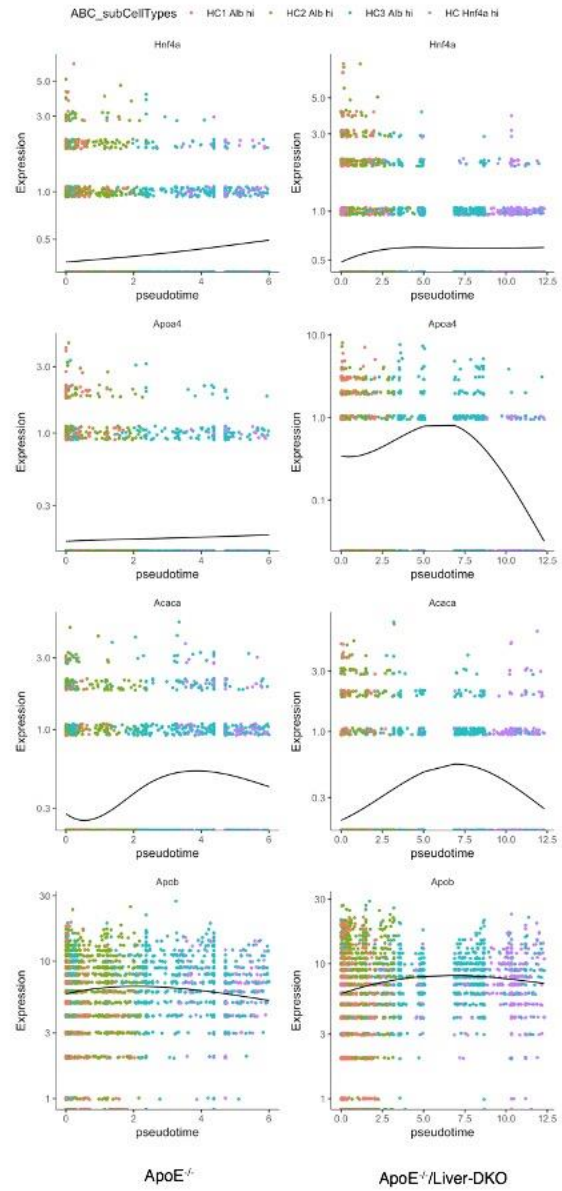

1677  
1678  
1679  
1680  
1681  
1682  
1683  
1684  
1685  
1686

1687  
1688

**Fig.S8**

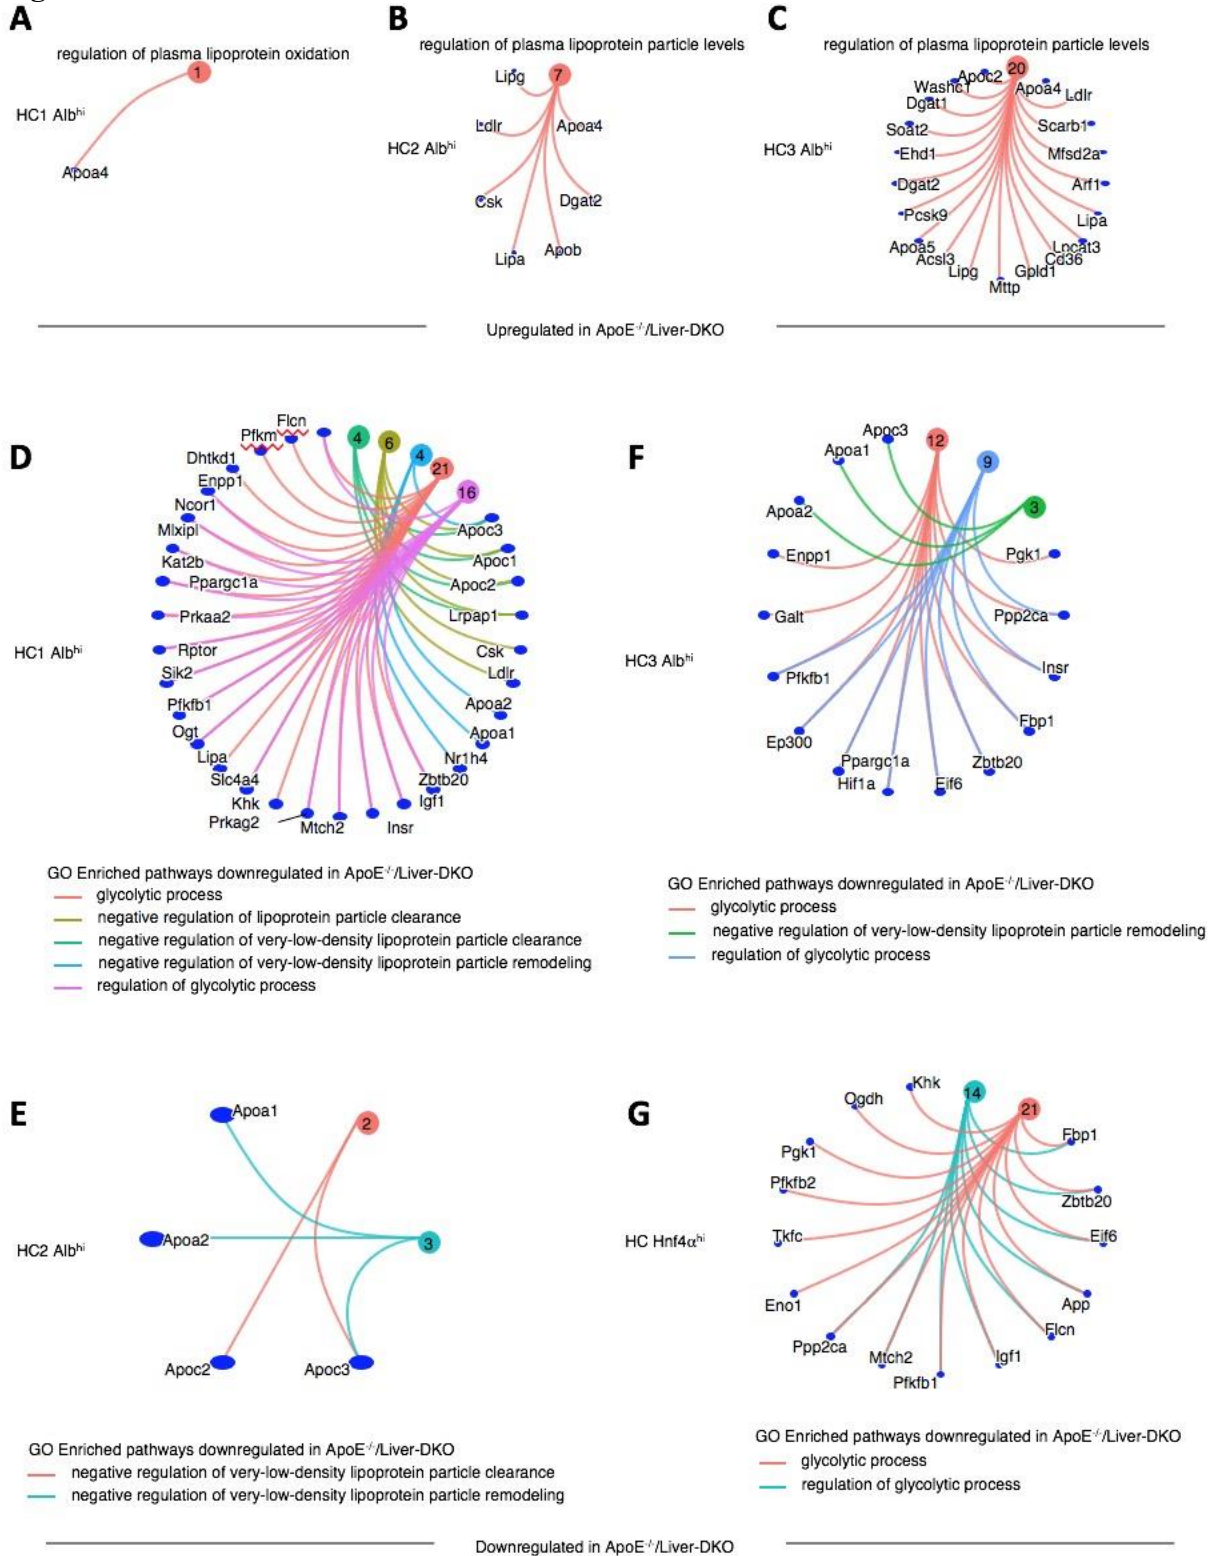

1689  
1690  
1691



1692  
1693  
1694  
1695  
1696

**Fig.S9**

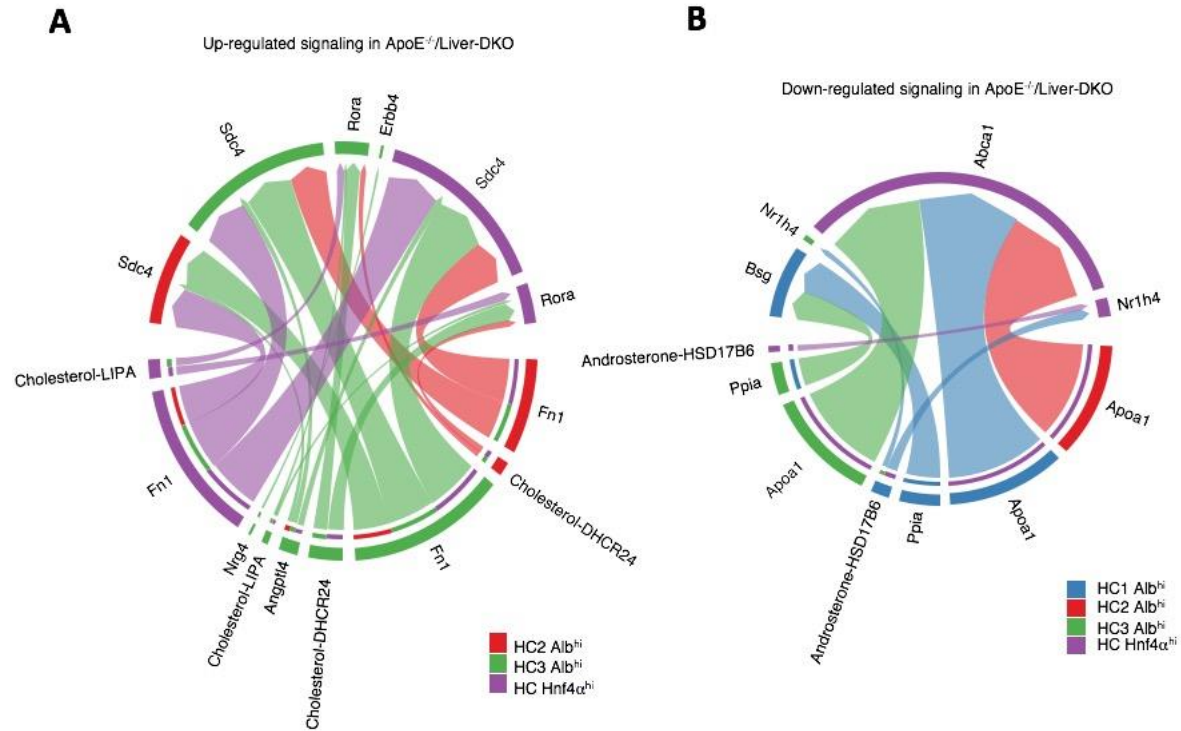

1697  
1698  
1699  
1700  
1701  
1702  
1703  
1704  
1705  
1706  
1707  
1708  
1709  
1710  
1711  
1712  
1713  
1714  
1715  
1716  
1717  
1718

1719  
1720  
1721  
1722  
1723  
1724

**Fig.S10**

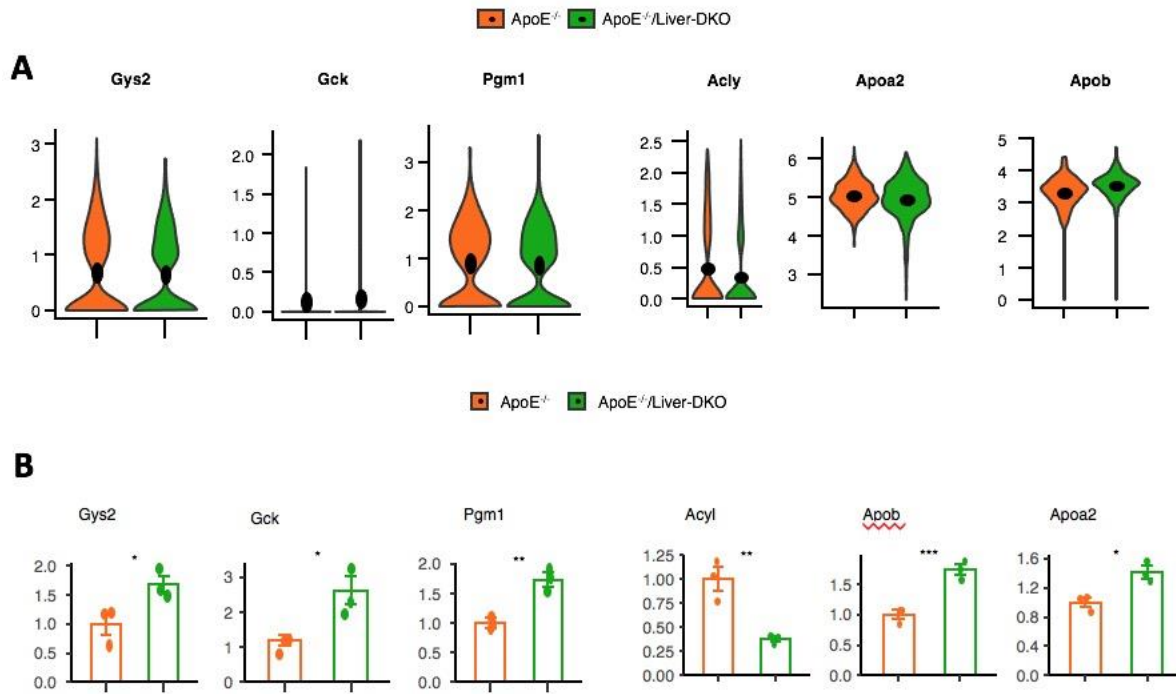

1725  
1726  
1727  
1728  
1729  
1730  
1731  
1732  
1733  
1734  
1735  
1736  
1737  
1738  
1739  
1740  
1741  
1742  
1743  
1744  
1745  
1746

1747  
1748

Fig.S11

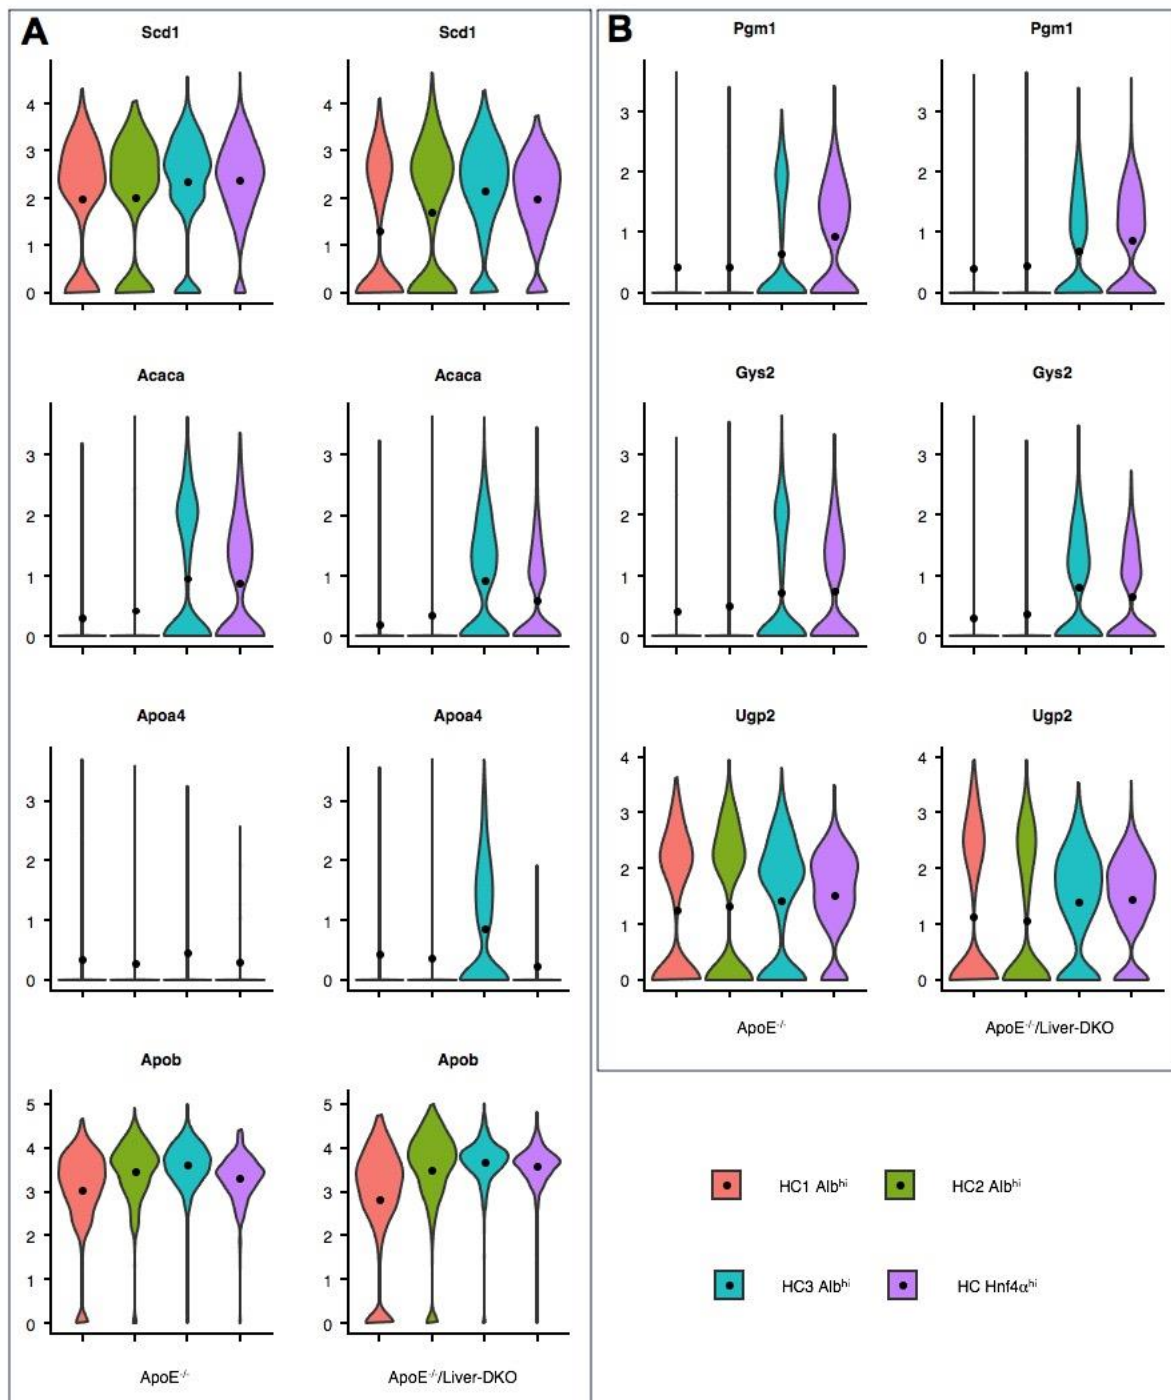

1749  
1750  
1751  
1752  
1753  
1754  
1755

1756  
1757  
1758

**Fig.S12**

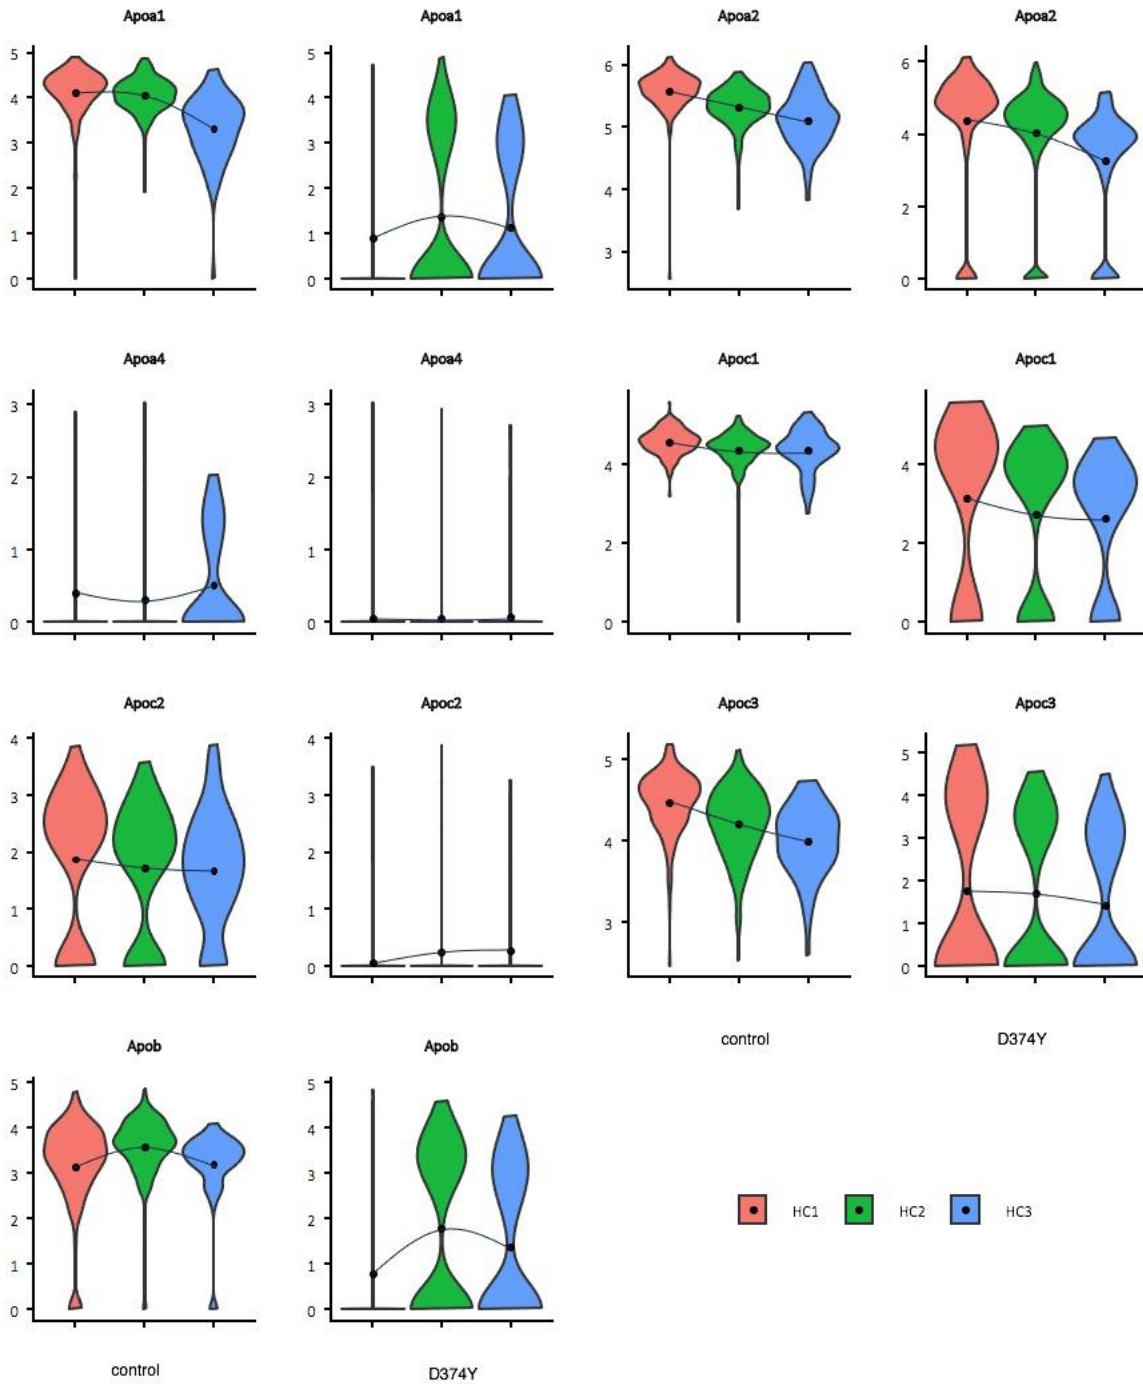

1759  
1760  
1761  
1762  
1763



1764  
1765

**Fig.S13**

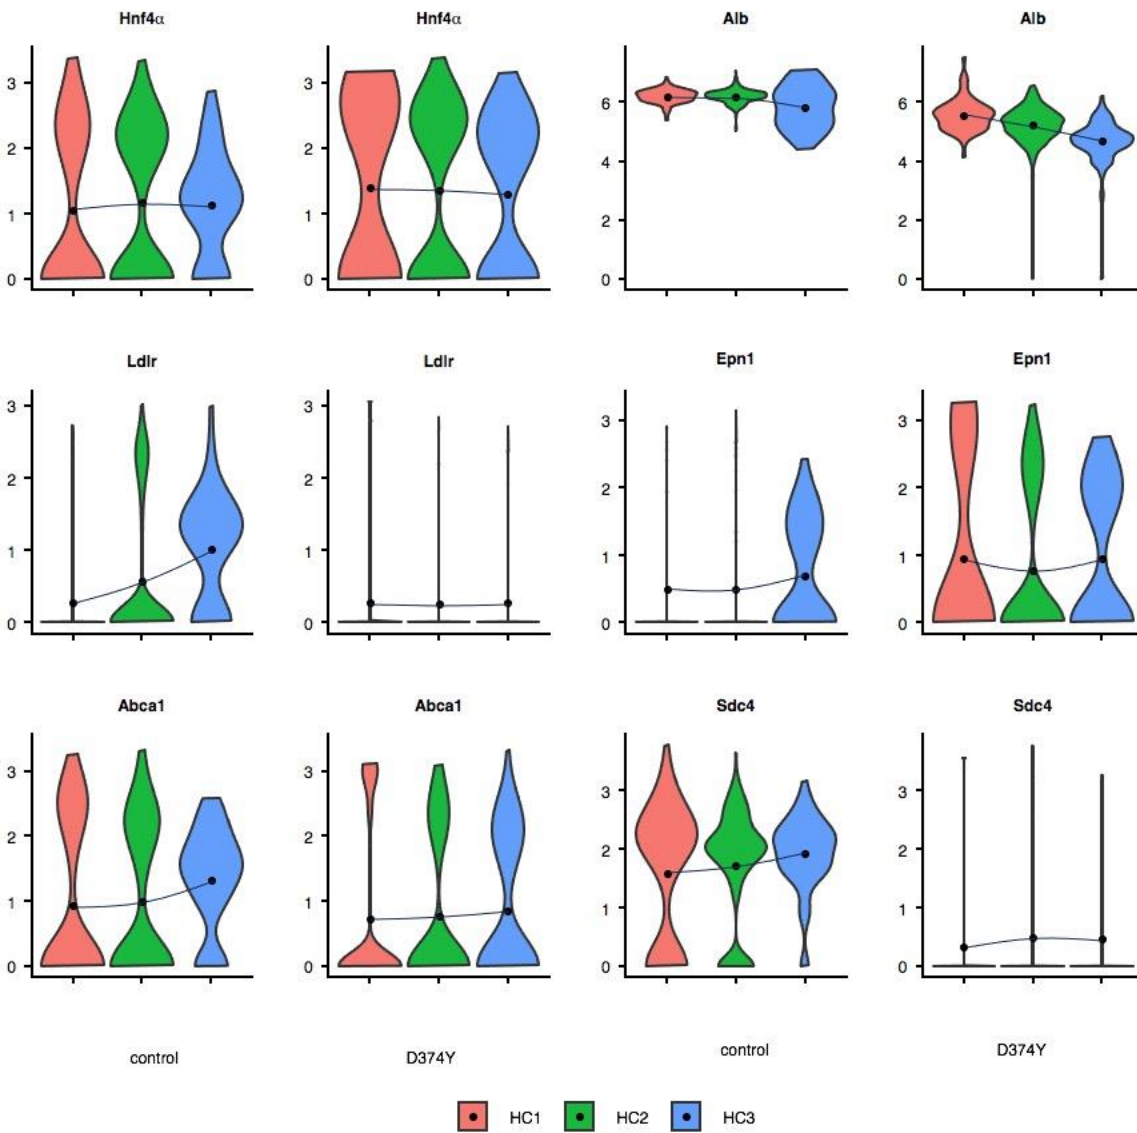

1766  
1767  
1768  
1769  
1770  
1771  
1772  
1773  
1774  
1775  
1776  
1777  
1778

1779

1780 **Fig.S14**

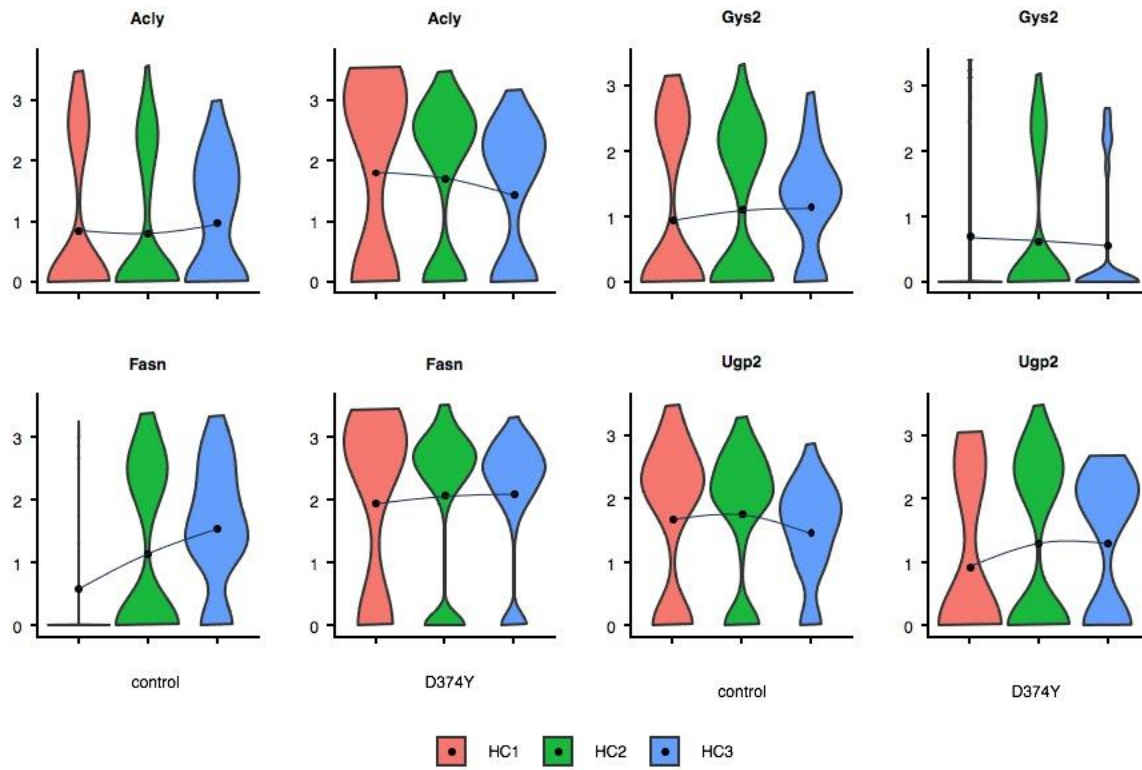

1781
